# Supplementary material for: Impacts of an intense wildfire smoke episode on surface radiation, energy and carbon fluxes in southwestern British Columbia, Canada
Source: Copernicus journal article supplement (doi:10.5194/acp-19-835-2019), 2019-01-22
Supplement: Supplementary file 1 [file acp-19-835-2019-supplement.pdf]

Supplement of Atmos. Chem. Phys., 19, 835–846, 2019  
<https://doi.org/10.5194/acp-19-835-2019-supplement>  
© Author(s) 2019. This work is distributed under  
the Creative Commons Attribution 4.0 License.

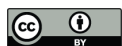

*Supplement of*

## **Impacts of an intense wildfire smoke episode on surface radiation, energy and carbon fluxes in southwestern British Columbia, Canada**

**Ian G. McKendry et al.**

*Correspondence to:* Ian G. McKendry (ian@geog.ubc.ca)

The copyright of individual parts of the supplement might differ from the CC BY 4.0 License.

## 1. Sites

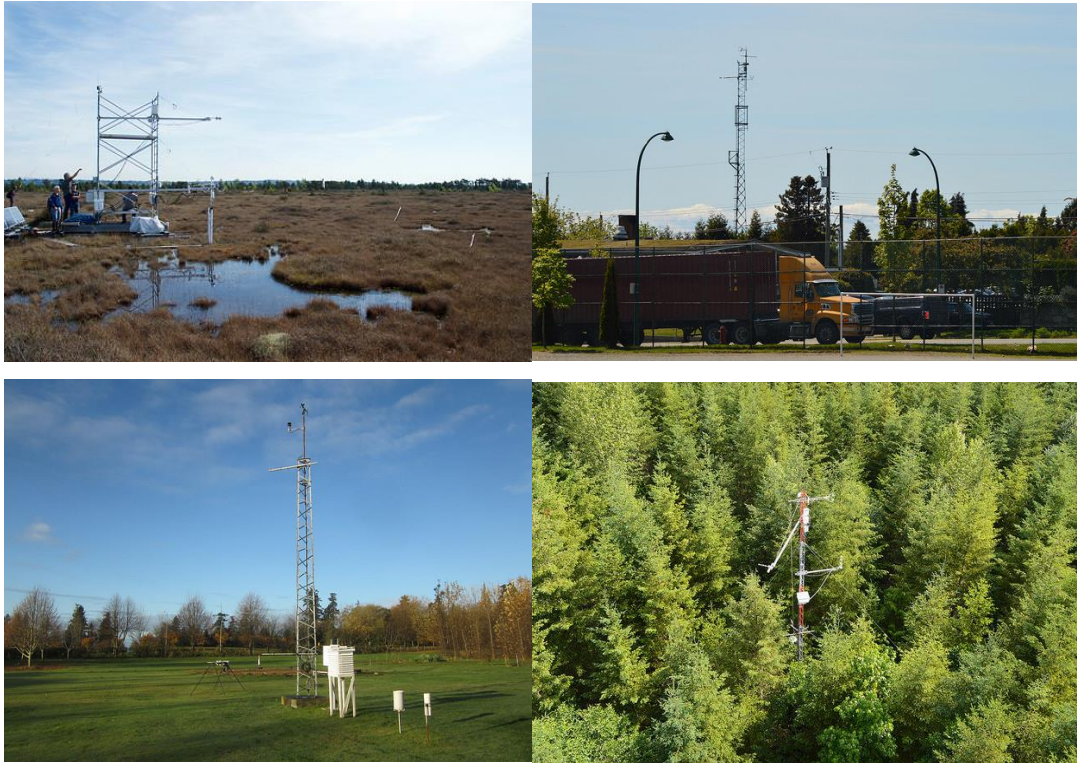

**Figure S1: Sites - clockwise from top left: Burns Bog, Vancouver-Sunset, Buckley Bay, UBC**

## 2. Instrumentation and Data Processing

| Measurement                                    | Site             | Instrument                        | Model   | Manufacturer                                   | Height above ground (m) |
|------------------------------------------------|------------------|-----------------------------------|---------|------------------------------------------------|-------------------------|
| <b>Shortwave irradiance</b>                    | Buckley Bay      | 4-Component Net Radiometer        | CNR1    | Kipp and Zonen, Delft, The Netherlands         | 15                      |
|                                                | Burns Bog        | 4-Component Net Radiometer        | CNR1    | Kipp and Zonen, Delft, The Netherlands         | 4.25                    |
|                                                | Vancouver-UBC    | Pyranometer                       | CM21    | Kipp and Zonen, Delft, The Netherlands         | 1.5                     |
|                                                | Vancouver-Sunset | 4-Component Net Radiometer        | CNR1    | Kipp and Zonen, Delft, The Netherlands         | 26.2                    |
| <b>Reflected Shortwave radiation</b>           | Buckley Bay      | 4-Component Net Radiometer        | CNR1    | Kipp and Zonen, Delft, The Netherlands         | 15                      |
|                                                | Burns Bog        | 4-Component Net Radiometer        | CNR1    | Kipp and Zonen, Delft, The Netherlands         | 4.25                    |
|                                                | Vancouver-UBC    | Pyranometer                       | CM21    | Kipp and Zonen, Delft, The Netherlands         | 1.5                     |
|                                                | Vancouver-Sunset | 4-Component Net Radiometer        | CNR1    | Kipp and Zonen, Delft, The Netherlands         | 26.2                    |
| <b>Longwave irradiance</b>                     | Buckley Bay      | 4-Component Net Radiometer        | CNR1    | Kipp and Zonen Delft, The Netherlands          | 15                      |
|                                                | Burns Bog        | 4-Component Net Radiometer        | CNR1    | Kipp and Zonen Delft, The Netherlands          | 4.25                    |
|                                                | Vancouver-UBC    | Pyrgeometer                       | PIR     | Eppley Laboratory Inc., Newport, USA           | 1.5                     |
|                                                | Vancouver-Sunset | 4-Component Net Radiometer        | CNR1    | Kipp and Zonen Delft, The Netherlands          | 26.2                    |
| <b>Emitted longwave radiation</b>              | Buckley Bay      | 4-Component Net Radiometer        | CNR1    | Kipp and Zonen Delft, The Netherlands          | 15                      |
|                                                | Burns Bog        | 4-Component Net Radiometer        | CNR1    | Kipp and Zonen Delft, The Netherlands          | 4.25                    |
|                                                | Vancouver-UBC    | Pyrgeometer                       | PIR     | Eppley Laboratory Inc., Newport, USA           | 1.5                     |
|                                                | Vancouver-Sunset | 4-Component Net Radiometer        | CNR1    | Kipp and Zonen,                                | 26.2                    |
| <b>PAR</b>                                     | Burns Bog        | Quantum sensor                    | LI-190  | LI-COR Inc., Lincoln, NE, USA                  | 4.25                    |
| <b>Wind components and sensible heat flux</b>  | Buckley Bay      | Ultrasonic anemometer-thermometer | R3      | Gill instruments Ltd., Lymington, UK           | 15                      |
|                                                | Burns Bog        | Ultrasonic anemometer-thermometer | CSAT-3  | Campbell Scientific Inc. (CSI), Logan, UT, USA | 1.8                     |
|                                                | Vancouver-Sunset | Ultrasonic anemometer-thermometer | CSAT-3  | Campbell Scientific Inc. (CSI), Logan, UT, USA | 28.8                    |
| <b>CO<sub>2</sub> concentration and fluxes</b> | Buckley Bay      | Infrared gas analyzer             | LI-7200 | LI-COR Inc., Lincoln, NE, USA                  | 15                      |
|                                                | Burns Bog        | Infrared gas analyzer             | LI-7500 | LI-COR Inc., Lincoln, NE, USA                  | 1.8                     |

|                                                |             |                       |         |                                  |     |
|------------------------------------------------|-------------|-----------------------|---------|----------------------------------|-----|
| <b>H<sub>2</sub>O concentration and fluxes</b> | Buckley Bay | Infrared gas analyzer | LI-7200 | LI-COR Inc.,<br>Lincoln, NE, USA | 15  |
|                                                | Burns Bog   | Infrared gas analyzer | LI-7500 | LI-COR Inc.,<br>Lincoln, NE, USA | 1.8 |

|                                             |                  |                                                                               |
|---------------------------------------------|------------------|-------------------------------------------------------------------------------|
| <b>Flux data processing and corrections</b> | Buckley Bay      | Matlab, Fluxnet Canada (Morgenstern et. al. (2004), Humphreys et. al. (2006). |
|                                             | Burns Bog        | SmartFlux, Lee at al. (2017)                                                  |
|                                             | Vancouver-Sunset | Crawford et al. (2012)                                                        |

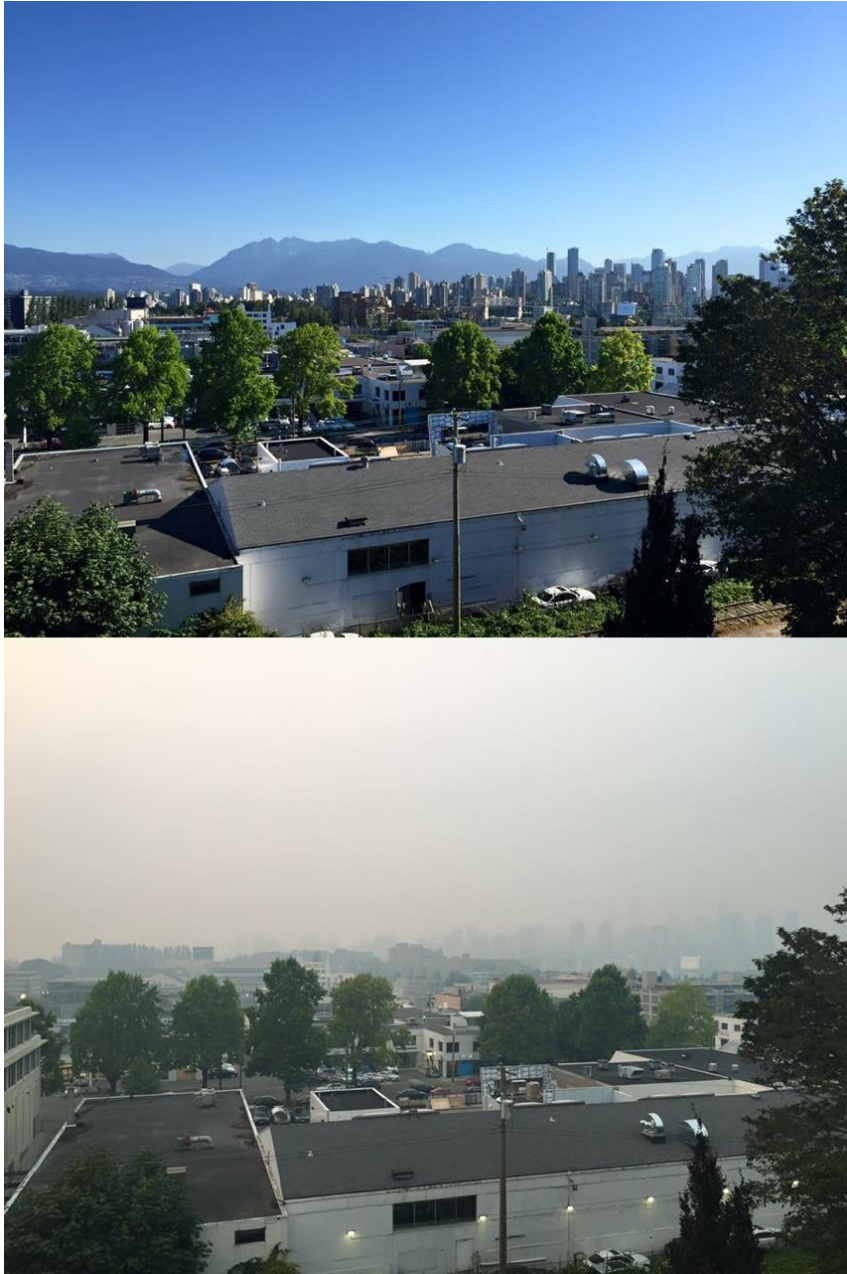

Figure S2: arrival of smoke on 5 July looking north across Downtown Vancouver compared to clear day (Photo courtesy from Elie Bou-Zeid, Princeton University)

### 3. AMDAR:

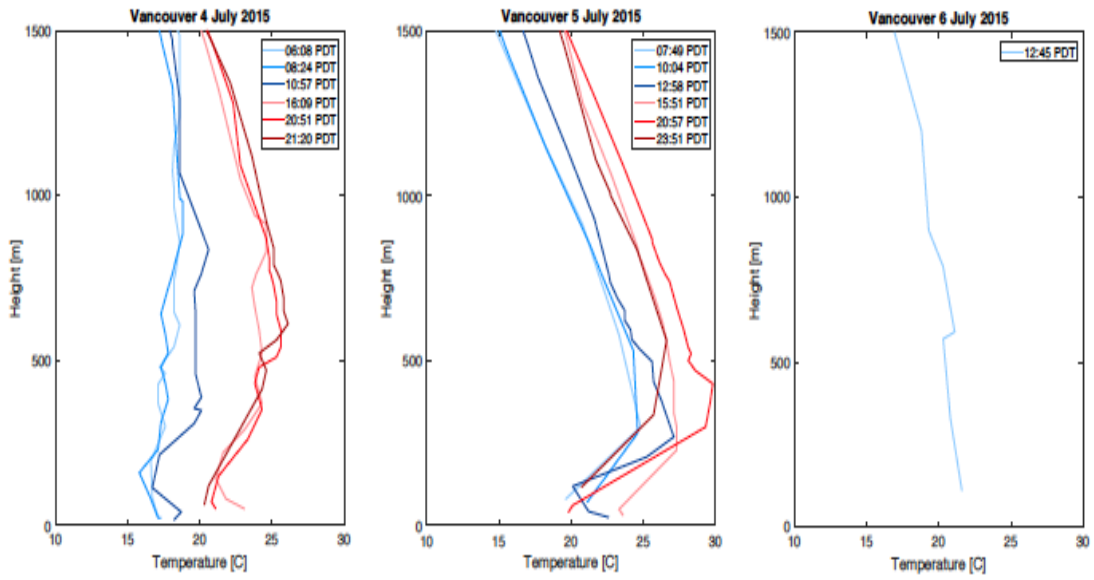

Figure S3 – vertical profiles from AMDAR

#### 4. HYSPLIT Modelling of the Event

Dispersion was modeled in order to confirm the smoke source using the NOAA Air Resources Laboratory HYSPLIT (HY-brid Single-Particle Lagrangian Integrated Trajectory) model Version 4 (<https://ready.arl.noaa.gov/HYSPLIT.php>). HYSPLIT 4 is the current version of a complete system for computing simple air parcel trajectories to complex dispersion and deposition simulations for any location and date (depending on data availability) using a variety of standard data input products (e.g. the NCEP Reanalysis 1948–present). For this case, the concentration fields were calculated for 24 hours for a fire source located at Elaho, covering 10000 ha and started at 0000 05 July 2015 UTC. Concentrations were averaged through a 1500m layer AGL with meteorology driven by the EDAS40 dataset.

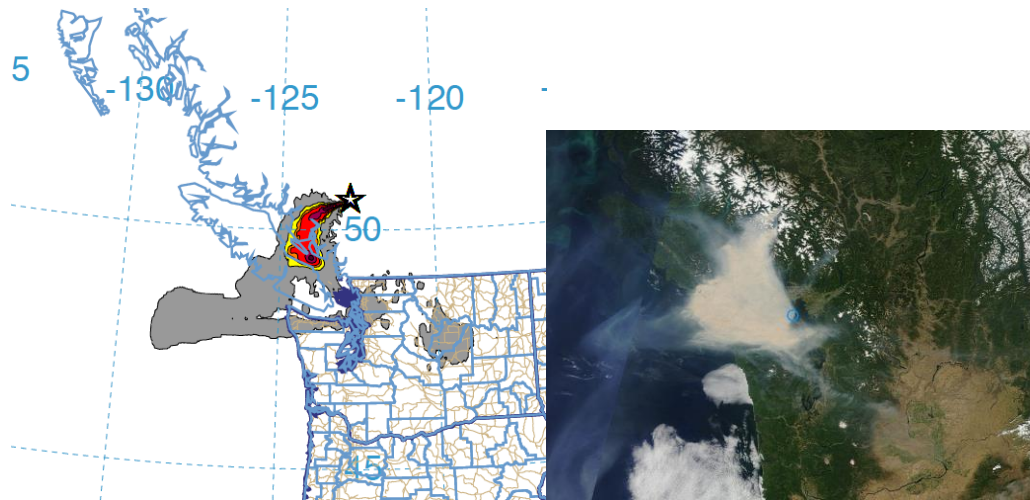

Figure S4: Modelled and observed 5 July: HYSPLIT run – 10,000 Ha, EDAS, 1500 m averaged 24 hour started 0000 5 July, UTC

#### References

Crawford, B. R., Christen, A. and Ketler, R.: Processing and Quality Control Procedures of Turbulent Flux Measurements During the Vancouver EPiCC Experiment. EPiCC Technical Report No. 1. doi:10.14288/1.0103593., 2012

Humphreys, E.R., Black, T.A., Morgenstern, K., Cai, T., Drewitt, G.B., Nestic, Z., Trofymow, J.A.: Carbon dioxide fluxes in coastal Douglas-fir stands at different stages of development after clearcut harvesting. *Agric. For. Meteorol.*, 140, 6–22, 2006.

Lee, S.-C., Christen, A., Black, A. T., Johnson, M. S., Jassal, R. S., Ketler, R., Nestic, Z., and Merkens, M.: Annual greenhouse gas budget for a bog ecosystem undergoing restoration by rewetting, *Biogeosciences*, 14, 2799-2814, <https://doi.org/10.5194/bg-14-2799-2017>, 2017.

Morgenstern, K., Black, T.A., Humphreys, E.R., Griffis, T.J., Drewitt, G.B., Cai, T., Nestic, N., Spittlehouse, D.L., Livingston, N.J.: Sensitivity and uncertainty of the carbon balance of a Pacific Northwest Douglas-fir forest during an El Nino/La Nina cycle, *Agricultural and Forest Meteorology*, 123, 3, 201-219, [doi.org/10.1016/j.agrformet.2003.12.003](https://doi.org/10.1016/j.agrformet.2003.12.003). 2004
